# Supplementary material for: ProThermDB: thermodynamic database for proteins and mutants revisited after 15 years
Source: PubMed Central journal article supplement — Nucleic Acids Res. 2020 Nov 16;49(D1):D420–4. doi: 10.1093/nar/gkaa1035 (PMC7778892; doi:10.1093/nar/gkaa1035), 2020-11-16
Supplement: gkaa1035_supplemental_file.pdf [file gkaa1035_supplemental_file.pdf]

## Supplementary information

**Table S1:** Comparison of data in ProThermDB and MPTherm databases

| Mutation type         | Data size     |              | Fold increase in ProThermDB |
|-----------------------|---------------|--------------|-----------------------------|
|                       | ProThermDB    | MPTherm      |                             |
| Total                 | 31580         | 7181         | 4.39                        |
| Wild-type             | 12050 (38.15) | 3808 (53.02) | 3.16                        |
| Single                | 16028 (50.75) | 2330 (32.44) | 6.87                        |
| Double                | 2046 (6.47)   | 362 (5.06)   | 5.65                        |
| Multiple ( $\geq 3$ ) | 1456 (4.63)   | 681 (9.48)   | 2.14                        |

Note: Percentage of data in each classification is shown in parenthesis

**Table S2:** Description of data items in ProThermDB with an example entry showing the experimental thermodynamic data of carbonic anhydrase 2 protein. Underline indicates hyperlinks to other databases

| <b>Description</b>                         | <b>Example</b>                                                                                       |
|--------------------------------------------|------------------------------------------------------------------------------------------------------|
| Entry                                      | 27543                                                                                                |
| Protein name                               | Carbonic anhydrase 2                                                                                 |
| Source name                                | Homo sapiens (Human)                                                                                 |
| UniProt ID                                 | <u>P00918</u>                                                                                        |
| Sequence length                            | 260                                                                                                  |
| Mutation (UniProt)                         | G145R                                                                                                |
| Mutation type                              | Single                                                                                               |
| PDB ID                                     | <u>12CA</u>                                                                                          |
| Solvent accessibility                      | 0.0                                                                                                  |
| Secondary structure                        | Helix                                                                                                |
| Temperature (°C)                           | 25.0                                                                                                 |
| pH                                         | 7.5                                                                                                  |
| Buffer name                                | -                                                                                                    |
| Buffer concentration                       | -                                                                                                    |
| Ion                                        | -                                                                                                    |
| Ion concentration                          | -                                                                                                    |
| Additives                                  | -                                                                                                    |
| Protein concentration                      | -                                                                                                    |
| Measure                                    | Fluorescence                                                                                         |
| Method                                     | GdnHCL                                                                                               |
| Remarks                                    | Parameters computed during native (N) to intermediate state (I) unfolding transition                 |
| $\Delta G^{\text{H}_2\text{O}}$ (kcal/mol) | 3.58 (1.58)                                                                                          |
| $\Delta\Delta G_{\text{H}_2\text{O}}$      | -0.36                                                                                                |
| $\Delta G$ (kcal/mol)                      | -                                                                                                    |
| $\Delta\Delta G$ (kcal/mol)                | -                                                                                                    |
| m (kcal/mol/M)                             | 6.23 (2.29)                                                                                          |
| Cm (M)                                     | 0.58                                                                                                 |
| Tm (°C)                                    | -                                                                                                    |
| $\Delta T_m$ (°C)                          | -                                                                                                    |
| $\Delta H$ (kcal/mol)                      | -                                                                                                    |
| $\Delta H_{\text{vH}}$ (kcal/mol)          | -                                                                                                    |
| $\Delta C_p$ (kcal/mol)                    | -                                                                                                    |
| State                                      | 3                                                                                                    |
| Reversibility                              | Yes                                                                                                  |
| PubMed id                                  | <u>31778702</u>                                                                                      |
| Authors                                    | Gupta, P., Mahlawat, P. and Deep, S                                                                  |
| Reference                                  | Int J Biol Macromol 143, 472-482 (2020) PMID: 31778702                                               |
| Location of the data                       | Table 2, p.479                                                                                       |
| Keywords                                   | Carbonic anhydrase deficiency syndrome; Human carbonic anhydrase II; Mutant; Protein destabilization |
